# Supplementary material
Source: Research Square preprint supplement (doi:10.21203/rs.3.rs-8783847/v1)
Supplement: Supplementary file 2 [file a8e9b4124b8305e24fe0df23.docx]

**English version of the self-designed teaching satisfaction questionnaire for EVD training**

1. This teaching model helps me understand and master the theoretical knowledge of EVD.

1 (Extremely dissatisfied) □ 2 (Dissatisfied) □ 3 (Neutral) □ 4 (Satisfied) □ 5 (Extremely satisfied) □

1. This teaching model effectively improves my EVD operational skills.

1 (Extremely dissatisfied) □ 2 (Dissatisfied) □ 3 (Neutral) □ 4 (Satisfied) □ 5 (Extremely satisfied) □

1. This teaching model stimulates my interest in learning EVD-related knowledge and skills.

1 (Extremely dissatisfied) □ 2 (Dissatisfied) □ 3 (Neutral) □ 4 (Satisfied) □ 5 (Extremely satisfied) □

1. This teaching model is helpful for the cultivation of my clinical thinking in EVD clinical practice.

1 (Extremely dissatisfied) □ 2 (Dissatisfied) □ 3 (Neutral) □ 4 (Satisfied) □ 5 (Extremely satisfied) □
